# Supplementary material
Source: publisher figshare collection journal article supplement (https://sage.figshare.com/ndownloader/files/21481737)
Supplement: Supplementary file 3 [file 21481737]

## Appendix 3

**Table A1** Demographic data of athletes included in the analysis at the three return to sport milestones.

|                                    | Completed clinically<br>pain free criteria<br>(n=61) | Completed controlled<br>sports training<br>(n=50) | Returned to full<br>team training<br>(n=75) | Lost to follow-up<br>(n=6) |
|------------------------------------|------------------------------------------------------|---------------------------------------------------|---------------------------------------------|----------------------------|
| <b>Age (y)</b>                     | 26.2 (4.3), 20-37                                    | 26.4 (4.5), 20-37                                 | 25.9 (4.3), 18-37                           | 23.2 (3.6), 18-28          |
| <b>Height (cm)</b>                 | 180.8 (9.5), 162-210                                 | 180.9 (9.2), 162-203                              | 180.0 (9.0), 162-210                        | 175.5 (5.2), 169-184       |
| <b>Weight (kg)</b>                 | 79.1 (14.1), 47-115                                  | 78.9 (13.4), 47-108                               | 78.2 (13.8), 47-115                         | 70.3 (8.9), 60-84          |
| <b>BMI (kg/m<sup>2</sup>)</b>      | 24.0 (2.8), 18-37                                    | 23.9 (2.4), 18-31                                 | 24.0 (2.8), 18-37                           | 22.8 (2), 19-25            |
| <b>Sport</b>                       |                                                      |                                                   |                                             |                            |
| Football                           | 35 (57%)                                             | 29 (58%)                                          | 43 (57%)                                    | 4 (67%)                    |
| Futsal                             | 12 (20%)                                             | 11 (22%)                                          | 16 (21%)                                    | 2 (33%)                    |
| Handball                           | 4 (7%)                                               | 4 (8%)                                            | 5 (7%)                                      | -                          |
| Volleyball                         | 4 (7%)                                               | 2 (4%)                                            | 5 (7%)                                      | -                          |
| Basketball                         | 4 (7%)                                               | 4 (8%)                                            | 4 (5%)                                      | -                          |
| Shot put                           | 1 (2%)                                               | -                                                 | 1 (1%)                                      | -                          |
| Table tennis                       | 1 (2%)                                               | -                                                 | 1 (1%)                                      | -                          |
| <b>Primary MRI injury location</b> |                                                      |                                                   |                                             |                            |
| Grade 0                            | <u>12 (20%)</u>                                      | <u>9 (18%)</u>                                    | <u>13 (17%)</u>                             | <u>1 (17%)</u>             |
| Grade 1                            | <u>16 (26%)</u>                                      | <u>13 (26%)</u>                                   | <u>18 (24%)</u>                             | <u>2 (33%)</u>             |
| - Adductor longus                  | 11 (18%)                                             | 9 (18%)                                           | 13 (17%)                                    | 1 (17%)                    |
| - Adductor brevis                  | 2 (3%)                                               | 2 (4%)                                            | 2 (3%)                                      | 1 (17%)                    |
| - Adductor magnus                  | 1 (2%)                                               | 1 (2%)                                            | 1 (1%)                                      | -                          |
| - Pectineus                        | 1 (2%)                                               | -                                                 | 1 (1%)                                      | -                          |
| - Obturator externus               | 1 (2%)                                               | 1 (2%)                                            | 1 (1%)                                      | -                          |
| Grade 2                            | <u>20 (33%)</u>                                      | <u>16 (32%)</u>                                   | <u>28 (37%)</u>                             | <u>2 (33%)</u>             |
| - Adductor longus                  | 18 (30%)                                             | 15 (30%)                                          | 26 (35%)                                    | 1 (17%)                    |
| - Adductor brevis                  | -                                                    | -                                                 | -                                           | -                          |
| - Adductor magnus                  | -                                                    | -                                                 | -                                           | -                          |
| - Pectineus                        | 1 (2%)                                               | -                                                 | 1 (1%)                                      | -                          |
| - Obturator externus               | 1 (2%)                                               | 1 (2%)                                            | 1 (1%)                                      | 1 (17%)                    |
| Grade 3                            | <u>13 (21%)</u>                                      | <u>12 (24%)</u>                                   | <u>16 (21%)</u>                             | <u>1 (17%)</u>             |
| - Adductor longus                  | 13 (21%)                                             | 12 (24%)                                          | 16 (21%)                                    | 1 (17%)                    |

Data reported as mean (SD), range, and number (%) of athletes.

**Table A2** Clinical measures of self-reported disability (five HAGOS subscales), pain provocation tests, and strength and range of motion at initial examination (baseline) and on the day of completion of the controlled sports training prior to first full team training (n=50, grade 0-2: n=38, grade 3: n=12). Only athletes who completed the controlled sports-specific training are included in this overview.

|                                            | Initial examination |                                |          |                              | Completed controlled sports training |                                |          |                              |
|--------------------------------------------|---------------------|--------------------------------|----------|------------------------------|--------------------------------------|--------------------------------|----------|------------------------------|
|                                            | <i>n</i>            | Grade 0-2<br>adductor injuries | <i>n</i> | Grade 3<br>adductor injuries | <i>n</i>                             | Grade 0-2<br>adductor injuries | <i>n</i> | Grade 3<br>adductor injuries |
| <b>HAGOS Pain</b><br>(0-100)               | 36                  | 80 [70-93], 20-100             | 12       | 48 [35-68], 33-80            | 36                                   | 100 [98-100], 80-100           | 11       | 100 [98-100], 80-100         |
| <b>HAGOS Symptoms</b><br>(0-100)           | 36                  | 71 [52-82], 14-93              | 12       | 39 [20-50], 0-68             | 36                                   | 100 [96-100], 75-100           | 11       | 89 [82-95], 68-100           |
| <b>HAGOS ADL</b><br>(0-100)                | 36                  | 83 [68-90], 30-100             | 12       | 50 [23-75], 10-80            | 36                                   | 100 [100-100], 80-100          | 11       | 100 [98-100], 80-100         |
| <b>HAGOS Sport</b><br>(0-100)              | 36                  | 58 [39-77], 9-100              | 12       | 31 [14-45], 6-53             | 36                                   | 100 [100-100], 69-100          | 11       | 97 [81-98], 63-100           |
| <b>HAGOS QOL</b><br>(0-100)                | 36                  | 70 [53-88], 20-100             | 12       | 40 [25-60], 10-85            | 36                                   | 100 [93-100], 35-100           | 11       | 85 [68-100], 25-100          |
| <b>Adductor palpation pain</b><br>(y/n)    | 38                  | 38 (100%)                      | 12       | 12 (100%)                    | 38                                   | 2 (5%)                         | 12       | 1 (8%)                       |
| <b>Adductor resistance pain</b><br>(y/n)   | 38                  | 34 (89%)                       | 12       | 12 (100%)                    | 38                                   | 2 (5%)                         | 12       | 2 (17%)                      |
| <b>Adductor stretch pain</b><br>(y/n)      | 38                  | 22 (58%)                       | 12       | 12 (100%)                    | 38                                   | 0 (0%)                         | 12       | 0 (0%)                       |
| <b>Bent Knee Fall Out</b>                  | 38                  |                                | 11       |                              | 37                                   |                                | 12       |                              |
| - LSI (%)                                  |                     | 94 (27), 11-140                |          | 48 (26), 10-94               |                                      | 99 (19), 73-146                |          | 101 (14), 77-120             |
| • injured leg (cm)                         |                     | 17 [13-21], 5-39               |          | 32 [25-36], 17-40            |                                      | 15 [13-17], 4-27               |          | 13 [11-15], 4-19             |
| • uninjured leg (cm)                       |                     | 15 [12-20], 4-32               |          | 14 [12-15], 4-16             |                                      | 15 [13-18], 4-27               |          | 15 [10-16], 4-18             |
| <b>Hip Abduction ROM</b>                   | 38                  |                                | 10       |                              | 37                                   |                                | 12       |                              |
| - LSI (%)                                  |                     | 88 (22), 42-133                |          | 61 (27), 8-92                |                                      | 102 (8), 82-117                |          | 99 (6), 93-117               |
| • injured leg (°)                          |                     | 37 (10), 23-58                 |          | 30 (13), 4-52                |                                      | 47 (8), 30-67                  |          | 49 (7), 39-67                |
| • uninjured leg (°)                        |                     | 43 (10), 20-68                 |          | 49 (6), 41-58                |                                      | 46 (9), 30-69                  |          | 49 (7), 39-67                |
| <b>Eccentric strength ability</b><br>(y/n) | 35                  | 25 (71%)                       | 12       | 3 (25%)                      | 37                                   | 37 (100%)                      | 12       | 12 (100%)                    |
| <b>Eccentric adduction strength</b>        |                     |                                |          |                              |                                      |                                |          |                              |
| <b>Side-lying</b>                          | 25                  |                                | 3        |                              | 37                                   |                                | 12       |                              |
| - LSI (%)                                  |                     | 73 (19), 23-104                |          | 34, 23-111                   |                                      | 97 [91-106], 80-129            |          | 95 [82-98], 56-110           |
| • injured leg (Nm/kg)                      |                     | 2.2 (0.8), 0.5-3.8             |          | 0.9, 0.6-3.0                 |                                      | 3.4 [3.0-3.9], 2.5-4.8         |          | 2.9 [2.4-3.2], 2.0-4.1       |
| • uninjured leg (Nm/kg)                    |                     | 3.0 (0.5), 2.1-4.2             |          | 2.7, 2.5-2.8                 |                                      | 3.4 [3.1-3.8], 2.4-4.8         |          | 3.1 [2.7-3.5], 2.0-4.3       |

|                                     |                        |                 |                             |                             |  |  |
|-------------------------------------|------------------------|-----------------|-----------------------------|-----------------------------|--|--|
| <b>Eccentric abduction strength</b> |                        |                 |                             |                             |  |  |
| <b>Side-lying</b>                   | 25                     | 3               | 37                          | 12                          |  |  |
| - LSI (%)                           | 95 (17), 64-128        | 85, 81-88       | 98 [92-110], 67-134         | 101 [94-116], 83-122        |  |  |
| • injured leg (Nm/kg)               | 2.5 (0.7), 1.0-3.7     | 2.7, 2.4-3.0    | 2.8 [2.4-3.3], 1.7-3.8      | 3.0 [2.7-3.2], 2.2-3.8      |  |  |
| • uninjured leg (Nm/kg)             | 2.7 (0.6), 1.6-4.0     | 3.2, 2.9-3.4    | 2.9 [2.4-3.2], 1.8-4.0      | 2.7 [2.6-3.1], 2.4-3.9      |  |  |
| <b>ADD/ABD ratio</b>                | 25                     | 3               | 37                          | 12                          |  |  |
| - injured leg                       | 0.88 (0.25), 0.45-1.28 | 0.38, 0.19-1.10 | 1.24 [1.1-1.31], 0.82-1.81  | 0.96 [0.84-1.10], 0.69-1.25 |  |  |
| - uninjured leg                     | 1.17 (0.25), 0.63-1.54 | 0.81, 0.73-0.96 | 1.22 [1.06-1.48], 0.78-2.19 | 1.06 [1.02-1.22], 0.77-1.41 |  |  |
| <b>Eccentric adduction strength</b> |                        |                 |                             |                             |  |  |
| <b>Supine</b>                       |                        |                 | 37                          | 12                          |  |  |
| - LSI (%)                           | n.a.                   | n.a.            | 105 (13), 78-135            | 80 (17), 47-105             |  |  |
| • injured leg (Nm/kg)               |                        |                 | 3.2 (0.7), 2.0-4.7          | 2.3 (0.5), 1.6-3.1          |  |  |
| • uninjured leg (Nm/kg)             |                        |                 | 3.1 (0.6), 1.8-4.4          | 2.9 (0.5), 2.0-3.8          |  |  |

HAGOS = Copenhagen Hip And Groin Outcomes Score, ADL = Activities of daily living, QOL = Quality of life, ROM = Range of motion, ADD = Adduction, ABD = Abduction. n.a. = not applicable. Missing data: Two players (grade 0-2) did not complete the HAGOS questionnaire at both time points, and one (grade 3) did not complete the questionnaire at discharge. Two players (grade 3) did not perform the hip abduction range of motion, and one player (grade 3) did not perform the BKFO test, due to pain in the initial examination. Three players (grade 0-2) were not able to perform the strength tests in the initial examination due to device malfunction. One player (grade 0-2) did not perform range of motion and strength tests at completion of treatment. Eccentric strength measures are only reported for athletes who were able to perform the eccentric adduction test.

**Table A3** Subsequent groin pain grouped for athletes with MRI grade 0-2 and grade 3 injuries, according to the RTS milestones and time after return to sport.

| Subsequent injuries                | Returned to full team training | Completed controlled sports training | Did not complete controlled sports training | Clinically pain free | Did not complete clinical pain free criteria |
|------------------------------------|--------------------------------|--------------------------------------|---------------------------------------------|----------------------|----------------------------------------------|
| <b>Grade 0-2 adductor injuries</b> | n = 59                         | n = 38                               | n = 21                                      | n = 48               | n = 11                                       |
| Re-injury                          |                                |                                      |                                             |                      |                                              |
| - 0-2m                             | 4/58 (7%)                      | 1/38 (3%)                            | 3/20 (15%)                                  | 1/47 (2%)            | 3/11 (27%)                                   |
| - 0-6m                             | 5/57 (9%)                      | 2/37 (5%)                            | 3/20 (15%)                                  | 2/46 (4%)            | 3/11 (27%)                                   |
| - 0-12m                            | 5/56 (9%)                      | 2/36 (6%)                            | 3/20 (15%)                                  | 2/45 (4%)            | 3/11 (27%)                                   |
| Other groin pain                   |                                |                                      |                                             |                      |                                              |
| - 0-2m                             | 8/58 (14%)                     | 6/38 (16%)                           | 2/20 (10%)                                  | 7/47 (15%)           | 1/11 (9%)                                    |
| - 0-6m                             | 10/57 (18%)                    | 7/37 (19%)                           | 3/20 (15%)                                  | 9/46 (20%)           | 1/11 (9%)                                    |
| - 0-12m                            | 12/56 (21%)                    | 7/36 (19%)                           | 5/20 (25%)                                  | 10/45 (22%)          | 2/11 (18%)                                   |
| <b>Grade 3 adductor injuries</b>   | n = 16                         | n = 12                               | n = 4                                       | n = 13               | n = 3                                        |
| Re-injury                          |                                |                                      |                                             |                      |                                              |
| - 0-2m                             | 1/16 (6%)                      | 1/12 (8%)                            | 0/4 (0%)                                    | 1/13 (8%)            | 0/3 (0%)                                     |
| - 0-6m                             | 1/16 (6%)                      | 1/12 (8%)                            | 0/4 (0%)                                    | 1/13 (8%)            | 0/3 (0%)                                     |
| - 0-12m                            | 1/16 (6%)                      | 1/12 (8%)                            | 0/4 (0%)                                    | 1/13 (8%)            | 0/3 (0%)                                     |
| Other groin pain                   |                                |                                      |                                             |                      |                                              |
| - 0-2m                             | 2/16 (13%)                     | 1/12 (8%)                            | 1/4 (25%)                                   | 1/13 (8%)            | 1/3 (33%)                                    |
| - 0-6m                             | 3/16 (19%)                     | 2/12 (17%)                           | 1/4 (25%)                                   | 2/13 (15%)           | 1/3 (33%)                                    |
| - 0-12m                            | 3/16 (19%)                     | 2/12 (17%)                           | 1/4 (25%)                                   | 2/13 (15%)           | 1/3 (33%)                                    |

*Data presented as number of subsequent injuries/number of athletes contacted at the respective time point, and reported as accumulative numbers.*

*Missing data: Three players could not be contacted for follow-up at one or more time points within 12m after return to sport as they moved to different countries.*
