# Supplementary material
Source: publisher figshare collection journal article supplement (https://sage.figshare.com/ndownloader/files/21481737)
Supplement: Supplementary file 4 [file 21481737]

Archive with 3 entries (3 files):
- Appendix_1_-_Clinical_examination_with_test_descriptions.pdf
- Appendix_2_-_Treatment_protocol.pdf
- Appendix_3_-_final.pdf
